# Supplementary material
Source: PubMed Central journal article supplement (PMC4201962)
Supplement: NIHMS624926-supplement-1.pdf [file NIHMS624926-supplement-1.pdf]

## Urine CSF1

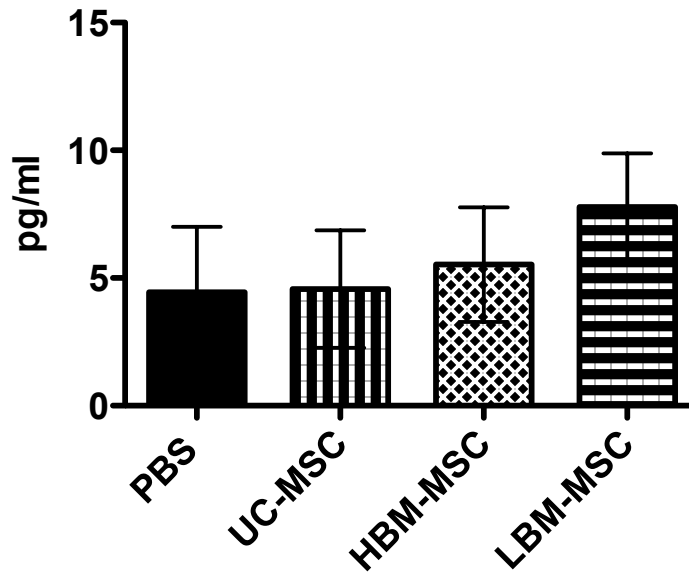

**Supplemental Figure 1. Urinary CSF1 in MRL/lpr mice.** Urinary CSF1 of MRL/lpr mice at 6 weeks post MSC transplant measured by ELISA. Results are expressed as the mean  $\pm$ SEM. PBS (n=4), UC-MSc (n=8), HBM-MSc (n=8), LBM-MSc (n=12).

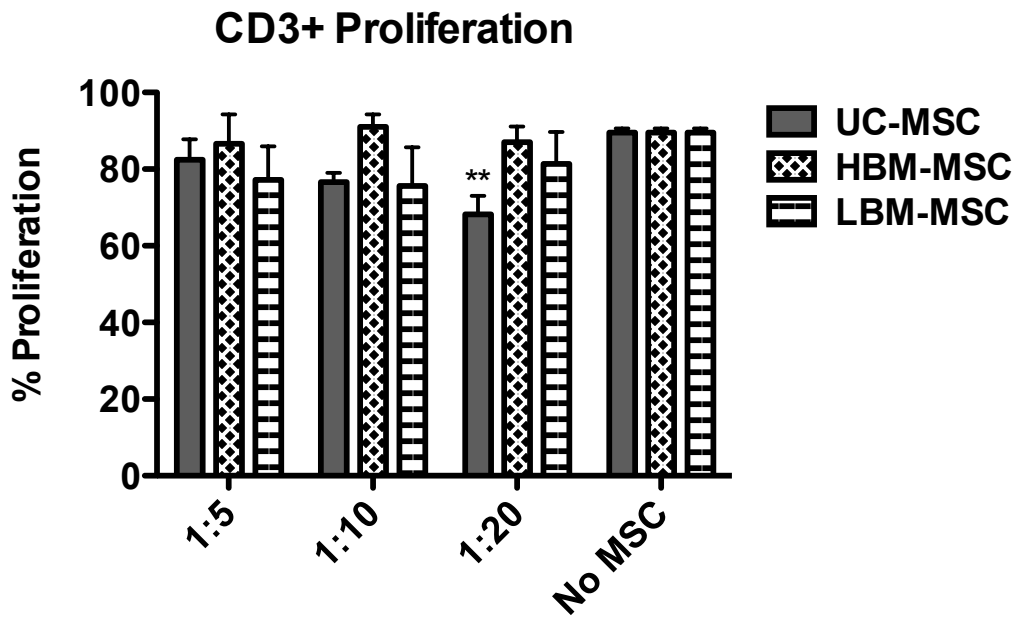

**Supplemental Figure 2. Mouse T cell proliferation in CFSE dilution assays co-cultured with different sources of human MSC.** Splenocytes were isolated from healthy MRL/*lpr* mice and were labeled with CFSE.  $5 \times 10^5$  splenocytes were stimulated with  $1 \mu\text{g/ml}$  anti-mouse CD3/CD28 antibodies alone ( $n=6$ ) or with varying concentrations of human UC-MSC ( $n=4$ ), HBM-MSC ( $n=6$ ), and LBM-MSC ( $n=4$ ). Plates were incubated for 72 hours at  $37^\circ\text{C}$  in a humidified atmosphere with 5%  $\text{CO}_2$ . Splenocytes were then collected, stained with anti-mouse APC-labeled CD3 proliferation status was analyzed by flow cytometry.
